# Supplementary material for: Design of 3D Controller Using Nanocracking Structure-Based Stretchable Strain Sensor
Source: MDPI journal article supplement (doi:10.3390/s23104941), 2023-05-21
Supplement: s1 [file s1]

Archive with 2 entries (2 files):
- Supplementary Information.pdf
- Supplementary Video S1.mp4
